# Supplementary material for: DNA mediated electrocatalytic enhancement of α-Fe2O3–PEDOT–C-MoS2hybrid nanostructures for riboflavin detection on screen printed electrode
Source: Royal Society of Chemistry journal article supplement (doi:10.1039/c6ra16279g), 2016-01-01
Supplement: c6ra16279g1.pdf [file c6ra16279g1.pdf]

Supporting Information

**DNA mediated electrocatalytic enhancement on  $\alpha$ -Fe<sub>2</sub>O<sub>3</sub>-PEDOT-C-MoS<sub>2</sub> hybrid nanostructures for Riboflavin detection on Screen Printed Electrode**

C.Sumathi, P. Muthukumar, P.Thivya, J.Wilson, G.Ravi

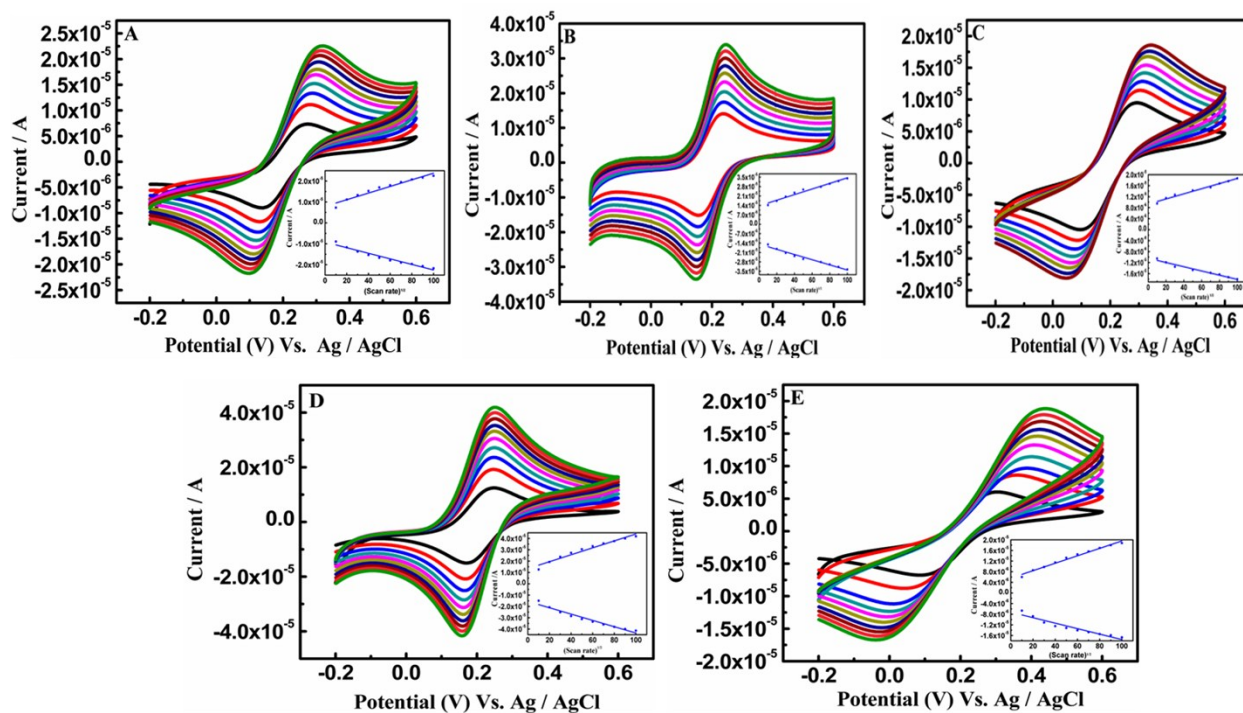

Fig. S1 CV Profiles (A)  $\alpha$ -Fe<sub>2</sub>O<sub>3</sub> (B) C-MoS<sub>2</sub> (C) PEDOT (D)  $\alpha$ -Fe<sub>2</sub>O<sub>3</sub>-PEDOT- C-MoS<sub>2</sub> (E)  $\alpha$ -Fe<sub>2</sub>O<sub>3</sub>-PEDOT- C-MoS<sub>2</sub>-DNA hybrid at 50 mVs<sup>-1</sup> for different scan rate 10-100 mVs<sup>-1</sup> in 0.1 M of KCl and 1mM of [Fe (CN)<sub>6</sub>]<sup>3-4</sup>

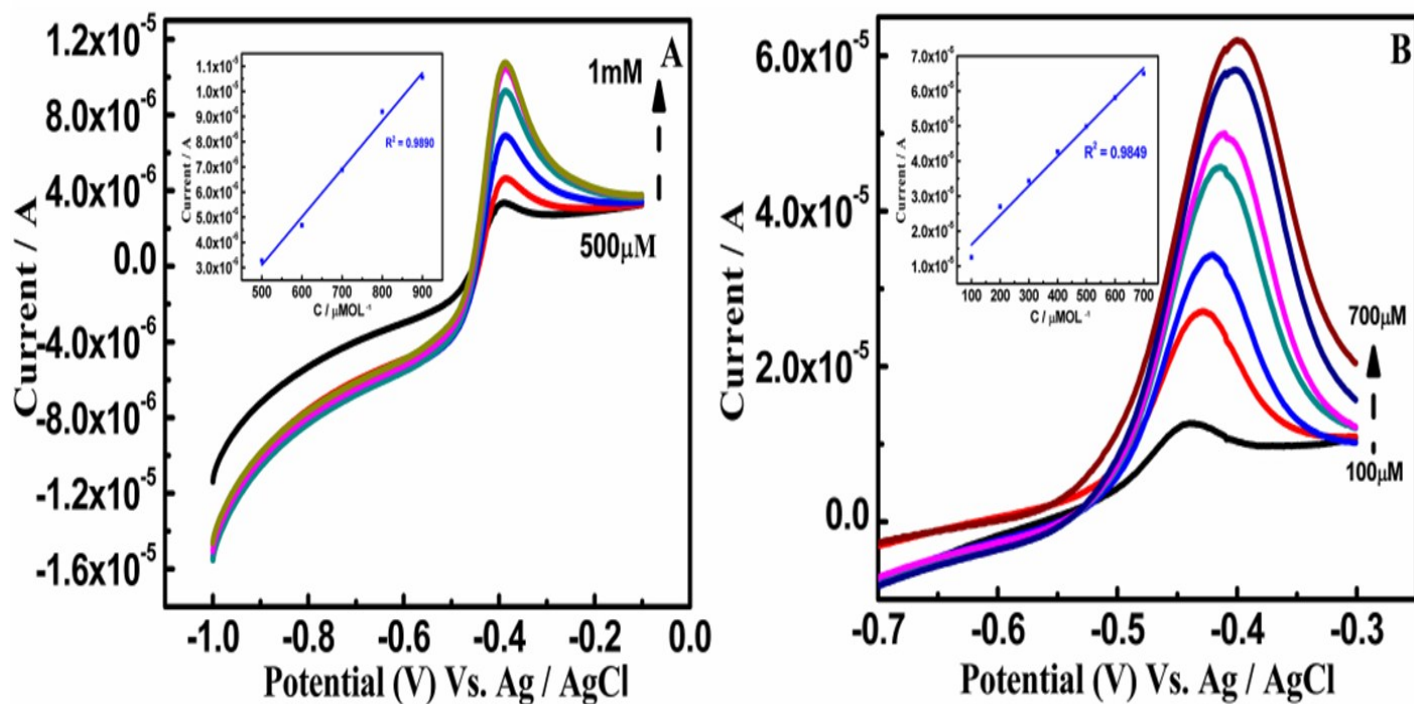

Fig. S2 LSV Curves (A)  $\alpha$ -Fe<sub>2</sub>O<sub>3</sub>-PEDOT-C-MoS<sub>2</sub>-DNA hybrid nanostructure (B)  $\alpha$ -Fe<sub>2</sub>O<sub>3</sub>-PEDOT- C-MoS<sub>2</sub> composite .

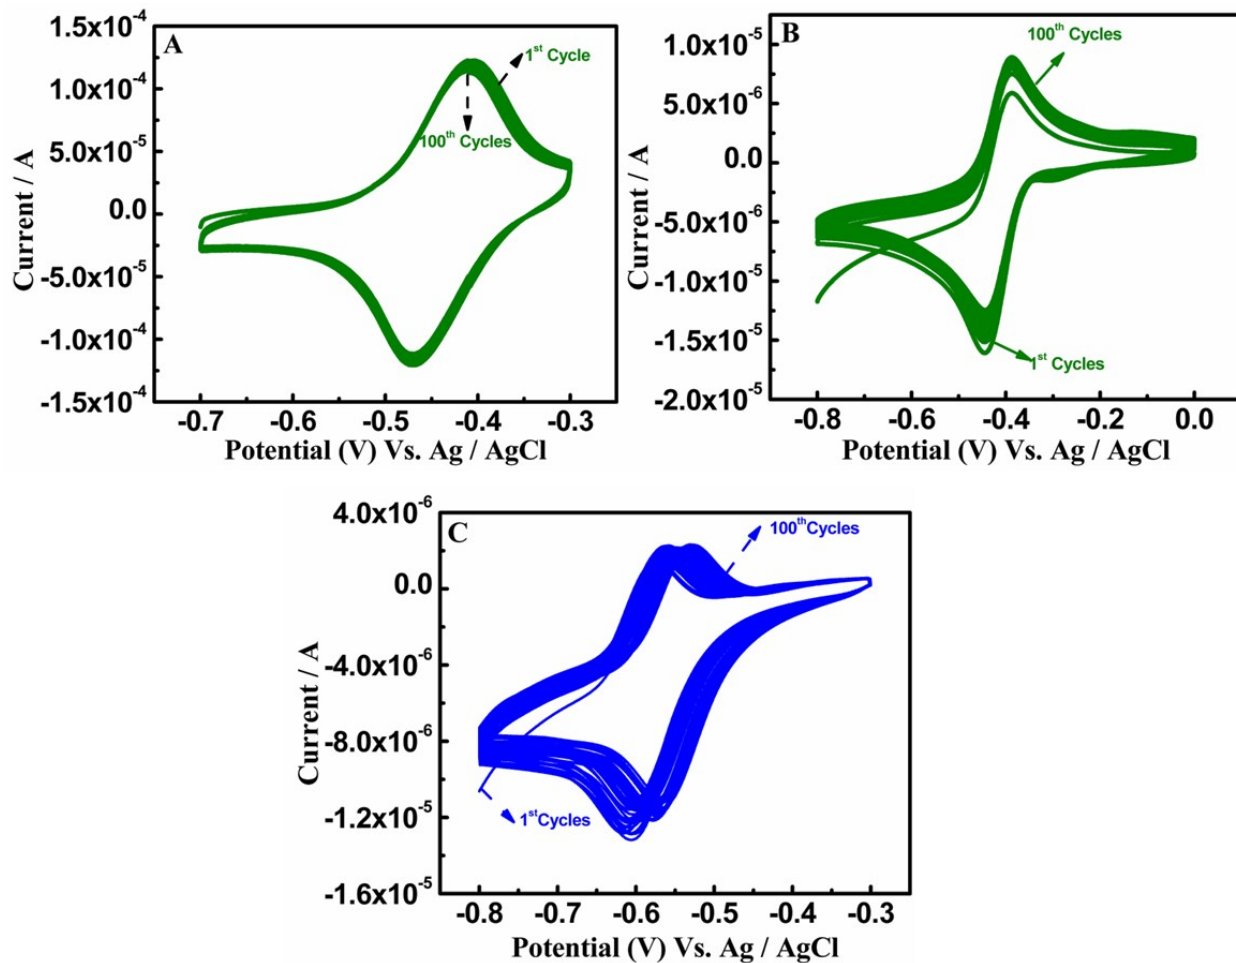

Fig.S3 (A)  $\alpha$ -Fe<sub>2</sub>O<sub>3</sub>-PEDOT- C-MoS<sub>2</sub> composite/GCE (B)  $\alpha$ -Fe<sub>2</sub>O<sub>3</sub>-PEDOT-C-MoS<sub>2</sub>-DNA/GCE hybrid nanostructure (C)  $\alpha$ -Fe<sub>2</sub>O<sub>3</sub>-PEDOT- C-MoS<sub>2</sub>-DNA/SPE hybrid nanostructure 100 cycles at 50 mVs<sup>-1</sup> in presence of 1mM of RF concentration

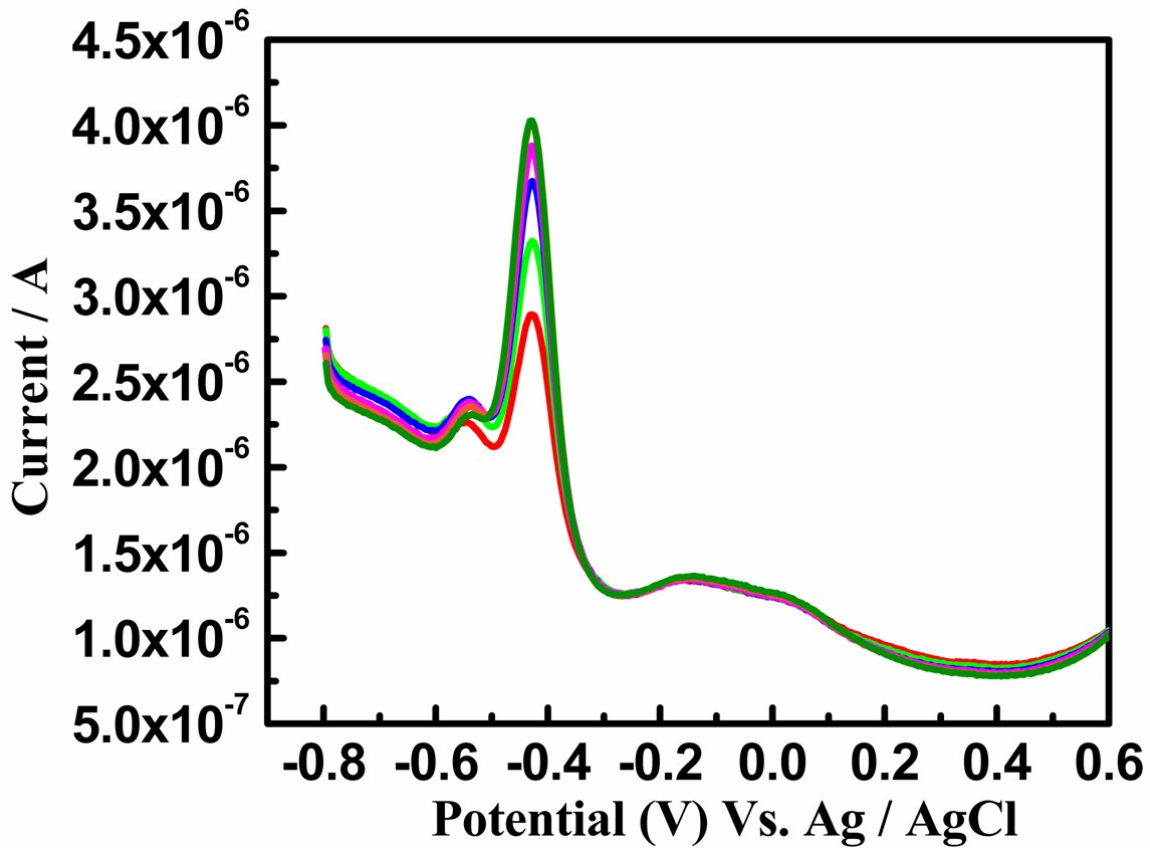

Fig. S4. SWV curves of  $\alpha$ -Fe<sub>2</sub>O<sub>3</sub>-PEDOT- C-MoS<sub>2</sub>-DNA/GCE hybrid nanostructure for RF of 50  $\mu$ M concentration while other interfering analytes at higher concentration

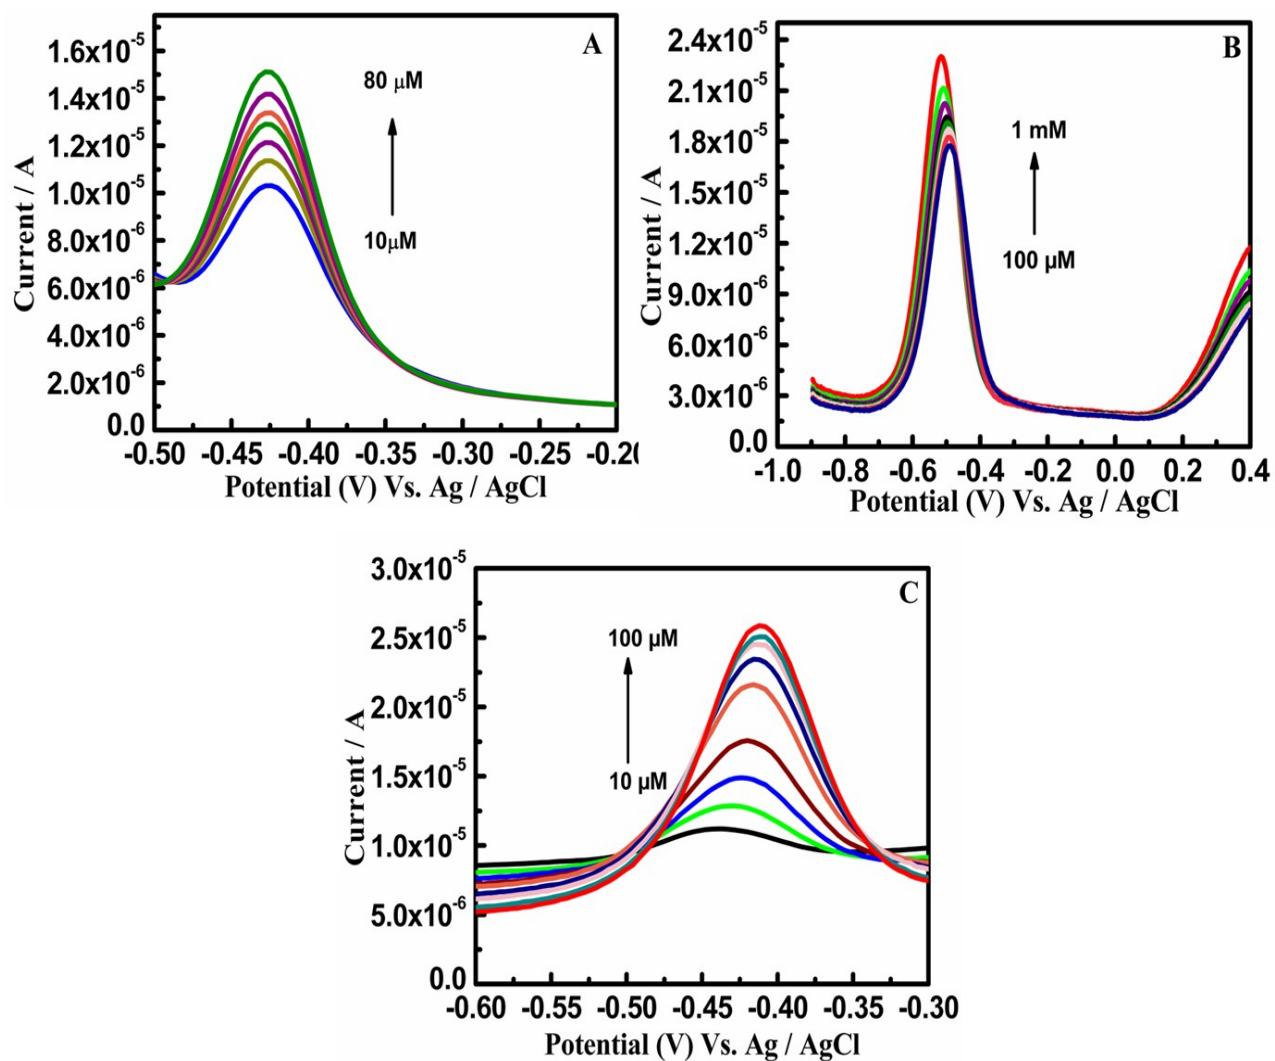

Fig. S5. SWV response of  $\alpha\text{-Fe}_2\text{O}_3\text{-PEDOT-C-MoS}_2\text{-DNA/GCE}$  at different concentration (A) human urine (B) milk powder (C) tablets in  $0.1 \text{ M}$  PBS containing pH  $7.0$ .

**Table S1** Effect of interference on RF determination for the  $\alpha$ -Fe<sub>2</sub>O<sub>3</sub>-PEDOT- C-MoS<sub>2</sub>-DNA hybrid modified electrode

| <b>Interfering species</b> | <b>Interferents concentration (<math>\mu</math>M)</b> | <b>Concentration ratio (Riboflavin: Interferents)</b> | <b>Recovery (%)</b> |
|----------------------------|-------------------------------------------------------|-------------------------------------------------------|---------------------|
| Folic acid                 | 10                                                    | 1:10                                                  | 94                  |
| Uric acid                  | 10                                                    | 1:10                                                  | 91                  |
| Ascorbic acid              | 10                                                    | 1:10                                                  | 90                  |
| L-dopa                     | 10                                                    | 1:10                                                  | 96                  |
| Serotonin                  | 10                                                    | 1:10                                                  | 94                  |
| Epineprine                 | 10                                                    | 1:10                                                  | 95                  |
| Cystamine                  | 10                                                    | 1:10                                                  | 94                  |
| Dopamine                   | 10                                                    | 1:10                                                  | 104                 |
| Tyrosine                   | 10                                                    | 1:10                                                  | 105                 |
| Fe                         | 100                                                   | 1:100                                                 | 94                  |
| Mg                         | 100                                                   | 1:100                                                 | 107                 |
| Ca                         | 100                                                   | 1:100                                                 | 95                  |
| K                          | 100                                                   | 1:100                                                 | 96                  |
| NO <sub>3</sub>            | 100                                                   | 1:100                                                 | 91                  |
| NH <sub>4</sub>            | 100                                                   | 1:100                                                 | 93                  |
| Cl                         | 100                                                   | 1:100                                                 | 93                  |

**Table S2** Determination of the RF content in commercial pharmaceutical products by SWV on the  $\alpha$ -Fe<sub>2</sub>O<sub>3</sub>-PEDOT- C-MoS<sub>2</sub>-DNA hybrid modified electrode.

| <b>Sample</b>           | <b>Reported content (mg)</b> | <b>Content found (mg)</b> | <b>Recovery %</b> |
|-------------------------|------------------------------|---------------------------|-------------------|
| 1. multivitamin tablet  | 10                           | 9.1                       | 91                |
| 2. multivitamin capsule | 2                            | 1.8                       | 90                |
| 3. Milk powder          | 1                            | 0.85                      | 91.7              |

**Table S3** Results for determination of RF in urine sample

| <b>Sample</b> | <b>Analyte</b> | <b>Added (<math>\mu</math>M)</b> | <b>Found (<math>\mu</math>M)</b> | <b>Recovery</b> |
|---------------|----------------|----------------------------------|----------------------------------|-----------------|
| urine         | RF             | 50                               | 48                               | 96              |
|               |                | 100                              | 102                              | 102             |
|               |                | 150                              | 141                              | 94              |
|               |                | 200                              | 193                              | 96.5            |

**Table S4**

Comparison of the efficiency of reported electrochemical methods in the determination of RF

| Electrode                                    | limit of detection (M)                                                         | linear range (M)                                  | reference |
|----------------------------------------------|--------------------------------------------------------------------------------|---------------------------------------------------|-----------|
| PEDOT/CIO <sub>4</sub> <sup>-</sup> /GCE     | 0.08 × 10 <sup>-6</sup>                                                        | 0.15–300 × 10 <sup>-6</sup>                       | [1]       |
| PEDOT/Fc <sup>-</sup> /GCE                   | 0.05 × 10 <sup>-6</sup>                                                        | 0.1–300 × 10 <sup>-6</sup>                        | [1]       |
| PEDOT/Fe(CN) <sub>6</sub> <sup>-4</sup> /GCE | 0.02 × 10 <sup>-6</sup>                                                        | 0.04–200 × 10 <sup>-6</sup>                       | [1]       |
| Aza / PCPE                                   | 5.3 × 10 <sup>-10</sup>                                                        | 1.33 × 10 <sup>-9</sup> – 1.86 × 10 <sup>-4</sup> | [2]       |
| P3MT/GCE                                     | 5.0 × 10 <sup>-8</sup>                                                         | 1.0 × 10 <sup>-7</sup> – 2.0 × 10 <sup>-4</sup>   | [3]       |
| CILE                                         | 1.0 × 10 <sup>-10</sup>                                                        | 8.0 × 10 <sup>-10</sup> – 1.1 × 10 <sup>-7</sup>  | [4]       |
| Ag amalgam film                              | 2.4 × 10 <sup>-8</sup>                                                         | 1.33 × 10 <sup>-7</sup> – 8.0 × 10 <sup>-6</sup>  | [5]       |
| Ds-DNA/ PCE                                  | 9.0 × 10 <sup>-7</sup>                                                         | 1.33×10 <sup>-6</sup> – 1.86 × 10 <sup>-4</sup>   | [6]       |
| AgSAEs                                       | 8.2 × 10 <sup>-10</sup> (m – AgSAE)<br>and 1.3 × 10 <sup>-9</sup><br>(p-AgSAE) | -                                                 | [7]       |
| DNA/CNT                                      | 5.31 × 10 <sup>-13</sup>                                                       | -                                                 | [8]       |
| WO <sub>3</sub> – TiO <sub>2</sub>           | 1.87 × 10 <sup>-7</sup>                                                        | 3.23 × 10 <sup>-7</sup> - 4.0 × 10 <sup>-5</sup>  | [9]       |
| Cr- SnO <sub>2</sub>                         | 1.07 × 10 <sup>-7</sup>                                                        | 0.2 × 10 <sup>-6</sup> - 1.0 × 10 <sup>-4</sup>   | [10]      |

**References for Table S4**

1. Tao Nie , Jing-Kun Xu, Li-Min Lu, Kai-Xin Zhang *Biosens. Bioelectron.*, 2013, **50**, 244..
- 2 M. Kotkar, P.B. Desai and A.K. Srivastava, *Sensor Actuat.*, B, 2007, **124**, 90.
3. H. Zhang, J. Zhao, H. Liu and H. Wang, *Int. J. Electrochem. Sci.*, 2010, **5**, 295.
- 4 A. Safavi,N. Maleki, H. Ershadifar and F.Tajabadi, *Anal. Chim. Acta*, 2010, **674**, 176.
- 5 Bas .S.Lakubowska and M.Girski, 2011,*Talanta*, **84**,1032.
- 6 A. Ensafi, E Heydari-Bafrooei and M. Amini, *Biosens. Bioelectron.*, 2012, **31**, 376.
- 7 L.Bandzuchova, R. Selesovska, T.Navratil and J. Chylkov, *Electrochim. Acta*, 2012, **75**, 316.
- 8 Y. Ly, H.S. Yoo, J.Y. Ahn and K.H. Nam, *Food Chem.*, 2011, **127**, 270.
- 9 Y. Li,P.C Hsu and S.M. Chen, *Sensor Actuat. B*, 2012,**174**,427.
- 10 N. Lavanya, S. Radhakrishnan, C. Sekar,and M. Navaneethan. *Analyst*, 2013, **138**, 2061
